# Supplementary material for: Transcriptional response of Bacillus megaterium FDU301 to PEG200-mediated arid stress
Source: PubMed Central journal article supplement (PMC7670681; doi:10.1186/s12866-020-02039-4), 2020-11-16
Supplement: 12866_2020_2039_MOESM7_ESM.pdf [file 12866_2020_2039_MOESM7_ESM.pdf]

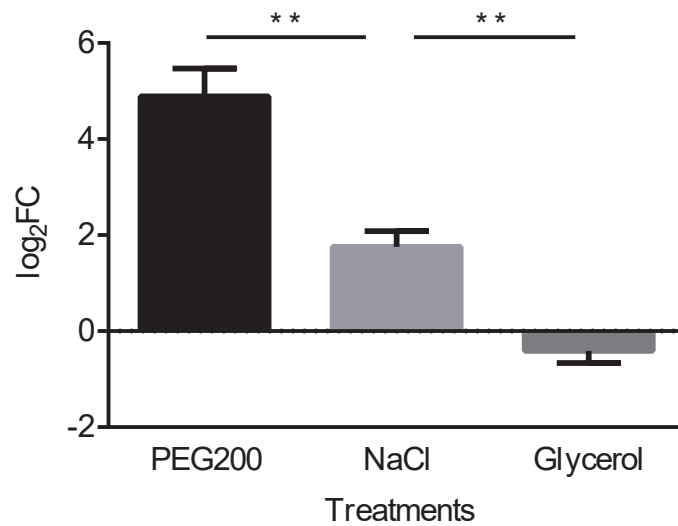

**Fig. S3 Effect of different water activity regulators on the expression of *tipA* gene.** The expression of *tipA* gene in *B. megaterium* FDU301 grown in LB medium of aw 0.985, using PEG200, sodium chloride and glycerol to adjust the water activity, respectively, were determined by real-time RT-qPCR. FC: fold of change in the transcriptional level in arid condition medium comparing to normal LB medium.
