# Supplementary material for: Transcriptional response of Bacillus megaterium FDU301 to PEG200-mediated arid stress
Source: BMC Microbiol. 2020 Nov 16;20:351. doi: 10.1186/s12866-020-02039-4 (PMC7670681; doi:10.1186/s12866-020-02039-4)
Supplement: Supplementary file 5 — Additional file 5: Table S4. Respiration-related genes. [file 12866_2020_2039_MOESM5_ESM.xlsx]

## Sheet: Sheet1
Gene ID	Gene Name	KO ID	KO Description
FDZ14_RS01350	atpB	K02108	F-type H+-transporting ATPase subunit a
FDZ14_RS01355	atpE	K02110	F-type H+-transporting ATPase subunit c
FDZ14_RS01360	atpF	K02109	F-type H+-transporting ATPase subunit b
FDZ14_RS01365	atpH	K02113	F-type H+-transporting ATPase subunit delta
FDZ14_RS01370	atpA	K02111	F-type H+-transporting ATPase subunit alpha
FDZ14_RS01375	atpG	K02115	F-type H+-transporting ATPase subunit gamma
FDZ14_RS01380	atpD	K02112	F-type H+-transporting ATPase subunit beta
FDZ14_RS01385	atpC	K02114	F-type H+-transporting ATPase subunit epsilon
FDZ14_RS01875	pgk	K00927	phosphoglycerate kinase
FDZ14_RS01880	tpiA	K01803	triosephosphate isomerase
FDZ14_RS16380	frmA	K00121	S-(hydroxymethyl)glutathione dehydrogenase / alcohol dehydrogenase
